# Supplementary material
Source: publisher figshare collection journal article supplement (https://acs.figshare.com/ndownloader/files/3828181)
Supplement: Supplementary file 1 [file 3828181]

# **Revealing structural changes of prion protein during conversion from $\alpha$ -helical monomer to $\beta$ -oligomers by means of ESR and nanochannel encapsulation**

Che Yang<sup>1,2</sup>, Wei-Lin Lo<sup>1,2</sup>, Yun-Hsuan Kuo<sup>3</sup>, Jason C. Sang<sup>1,2</sup>, Chung-Yu Lee<sup>1,2</sup>,  
Yun-Wei Chiang<sup>3,\*</sup>, and Rita P.-Y. Chen<sup>1,2,\*</sup>

<sup>1</sup>Institute of Biochemical Sciences, National Taiwan University, Taipei 10617, Taiwan

<sup>2</sup>Institute of Biological Chemistry, Academia Sinica, Taipei 11529, Taiwan

<sup>3</sup>Department of Chemistry, National Tsing Hua University, Hsinchu 30013, Taiwan

## **Supporting Information**

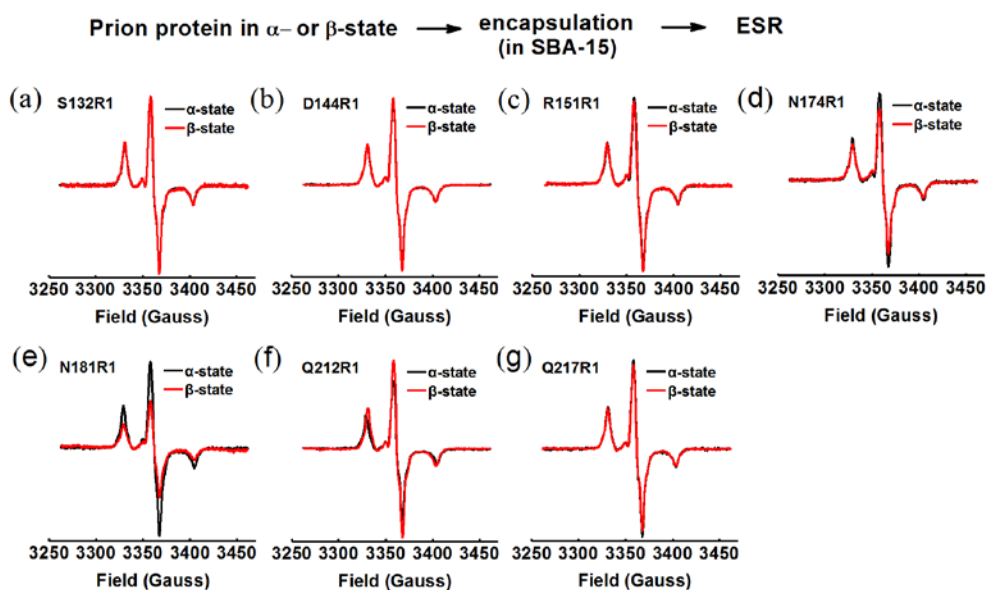

**Figure S1. Cw-ESR spectra of single-labeled mutants in the  $\alpha$ -state or  $\beta$ -state.**

The buffer used to prepare proteins in the  $\alpha$ - or  $\beta$ - state was 0.5 mM NaOAc (pH 5) or 10 mM NaOAc (pH 7), respectively. S132R1, D144R1, R151R1, N174R1, N181R1, Q212R1, and Q217R1 were encapsulated in SBA-15 and their cw-ESR spectra in the  $\alpha$ -state (black) or  $\beta$ -state (red) were recorded at 200K.

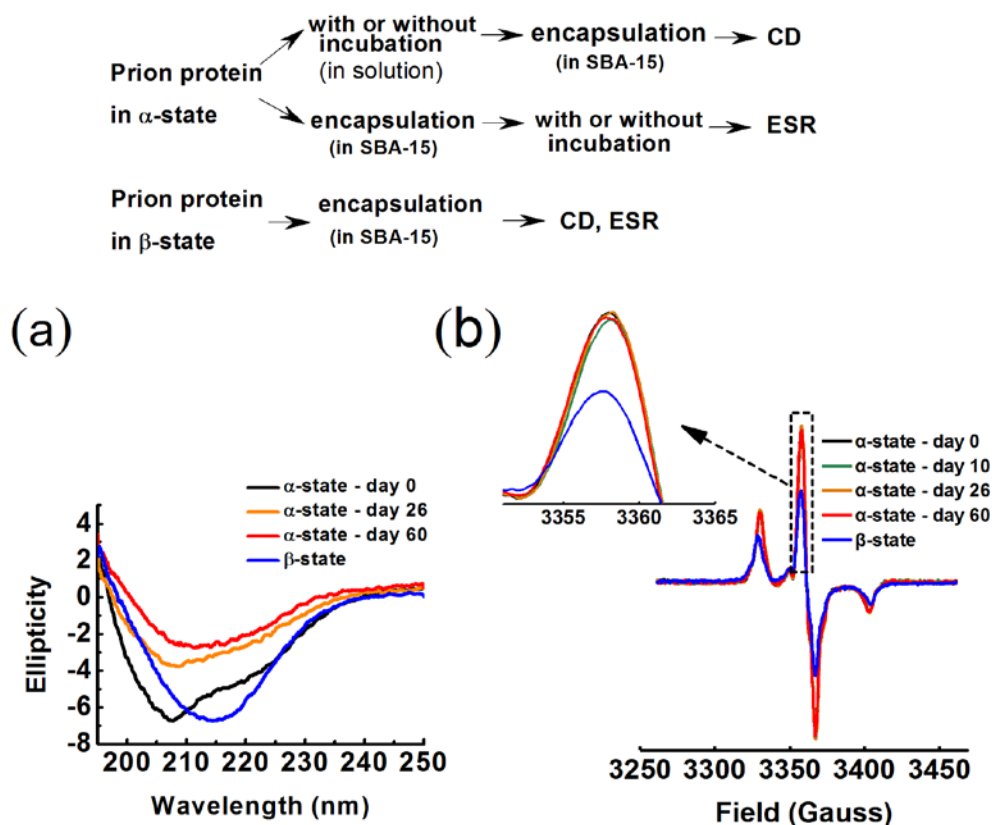

**Figure S2. Conformational changes in N174R1 in buffer or in nanochannels.**

To prepare N174R1 in the  $\alpha$ - or  $\beta$ -state, N174R1 was dissolved in, respectively, 0.5 mM NaOAc (pH 5) or 10 mM NaOAc (pH 7) at a final protein concentration of 10 mg/mL. (a) CD spectra of N174R1 in the  $\alpha$ -state (black) or  $\beta$ -state (blue) recorded immediately after preparation and of the  $\alpha$ -state N174R1 after incubation at 4 °C for 26 or 60 days in buffer. An aliquot of the N174R1 in the  $\alpha$ -state or  $\beta$ -state was encapsulated in SBA-15 nanochannels, and then the CD spectrum was recorded (marked as “day 0 for  $\alpha$ -state”). The rest of the  $\alpha$ -state N174R1 solution was incubated at 4 °C. At the indicated day, an aliquot of protein solution was

encapsulated in SBA-15 nanochannels, and the protein structure was checked by CD spectroscopy. (b) Cw-ESR spectra of  $\alpha$ -state N174R1 (fresh or incubated in nanochannels at 4 °C for 10, 26 and 60 days) and of  $\beta$ -state N174R1 in nanochannels. The cw-ESR spectra were measured at 200 K. These CD results show that N174R1 in buffer was converted from  $\alpha$ -state to  $\beta$ -state within 60 days, whereas the corresponding cw-ESR spectrum was distinctly sharper than the  $\beta$ -state spectrum (blue), indicating that, after 60 days, N174R1 in nanochannels could not associate with other PrP molecules and was a  $\beta$ -PrP monomer.

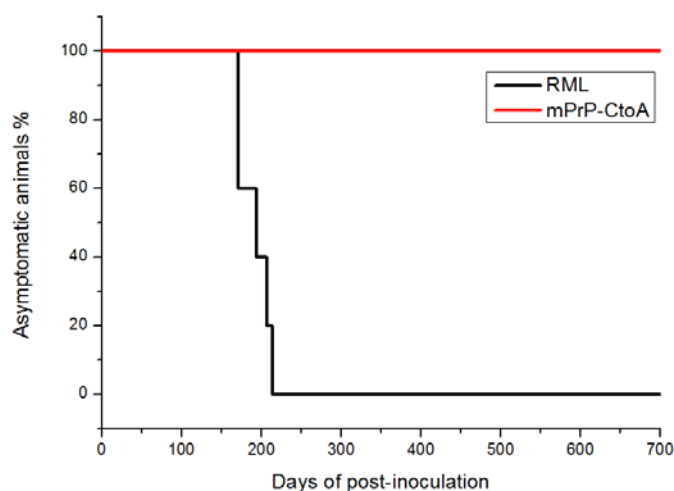

**Figure S3. Survival graphs for C57BL/6 mice inoculated with RML-prion or  $\beta$ -oligomers.** The mice were inoculated intracerebrally with 30  $\mu$ L of brain homogenate from a RML-infected mouse (n=5) or 30  $\mu$ L of  $\beta$ -oligomers formed from the disulfide bridge-lacking PrP protein mPrP-CtoA (0.1 mg/mL) in 10 mM NaOAc (pH 7) (n=4).

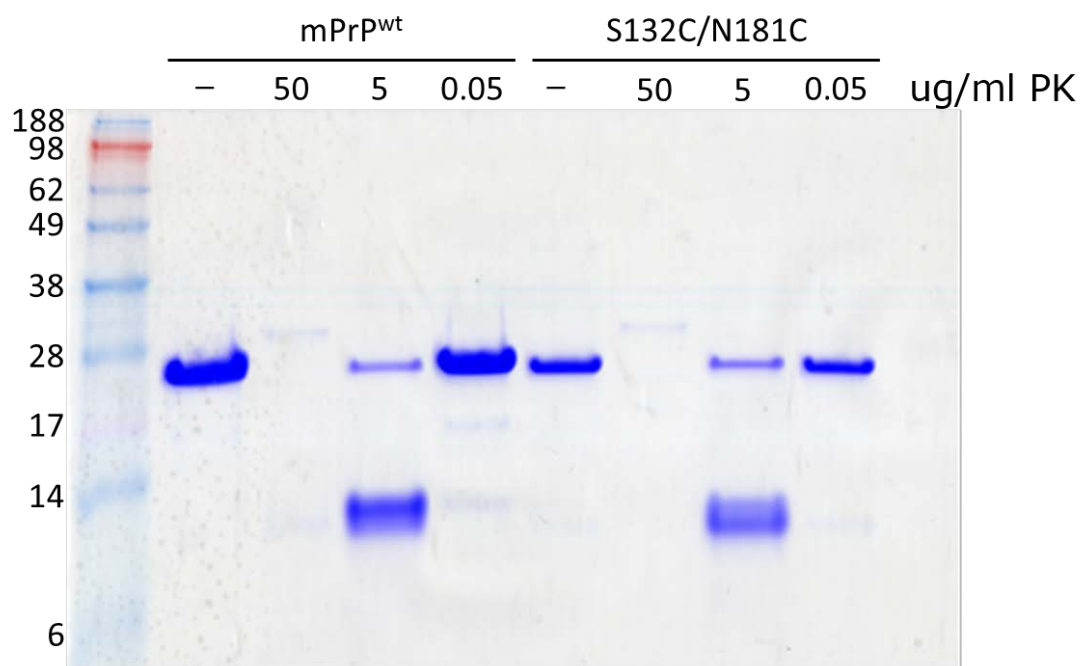

**Figure S4. Protease K digestion assay.** mPrP<sup>wt</sup> or S132C/N181C was dissolved in 10 mM NaOAc buffer (pH 7) at a protein concentration of 0.8 mg/mL. mPrP<sup>wt</sup> is a monomer, while S132C/N181C forms  $\beta$ -oligomers in this buffer. The protein samples were incubated at 37 °C for 1 h with the indicated concentration of recombinant proteinase K (Roche, Basel, Switzerland), then the reaction was terminated by addition of 5 mM PMSF and the samples analyzed by 12% SDS-PAGE.
